# Supplementary material
Source: PubMed Central journal article supplement (PMC2776423)
Supplement: 0909657106_0909657106SI.pdf [file 0909657106_0909657106SI.pdf]

# Supporting Information

Tsai et al. 10.1073/pnas.0909657106

Table S1. Metabolic parameters in *Pparg*<sup>B/B</sup> (B/B) and *Pparg*<sup>+/+</sup> (+/+) mice

|                            | 4 months, regular chow |           |           |           | 8 months, high-fat diet |           |           |           |
|----------------------------|------------------------|-----------|-----------|-----------|-------------------------|-----------|-----------|-----------|
|                            | Female                 |           | Male      |           | Female                  |           | Male      |           |
|                            | B/B                    | +/+       | B/B       | +/+       | B/B                     | +/+       | B/B       | +/+       |
| Number of mice             | 6–7                    | 7–10      | 8–9       | 8–10      | 5–8                     | 7–8       | 6–8       | 9         |
| BW, g                      | 21 ± 1                 | 20 ± 1    | 26 ± 1    | 26 ± 1    | 32 ± 3                  | 36 ± 3    | 37 ± 3    | 40 ± 2    |
| Kidney, % BW               | 0.7 ± 0.0              | 0.7 ± 0.0 | 0.7 ± 0.0 | 0.7 ± 0.0 | 0.5 ± 0.0               | 0.5 ± 0.0 | 0.6 ± 0.0 | 0.5 ± 0.0 |
| Liver, % BW                | 4.0 ± 0.2              | 4.0 ± 0.1 | 4.3 ± 0.1 | 4.5 ± 0.1 | 2.9 ± 0.2               | 2.9 ± 0.1 | 3.2 ± 0.2 | 3.6 ± 0.2 |
| Heart, % BW                | 0.5 ± 0.0              | 0.5 ± 0.0 | 0.5 ± 0.0 | 0.5 ± 0.0 | 0.4 ± 0.0               | 0.4 ± 0.0 | 0.4 ± 0.0 | 0.5 ± 0.0 |
| Spleen, % BW               | 0.4 ± 0.0              | 0.4 ± 0.0 | 0.3 ± 0.0 | 0.3 ± 0.0 | 0.3 ± 0.0               | 0.2 ± 0.0 | 0.2 ± 0.0 | 0.2 ± 0.0 |
| Pancreas, % BW             | 0.7 ± 0.0              | 0.7 ± 0.0 | 0.6 ± 0.0 | 0.6 ± 0.0 | 0.7 ± 0.1               | 0.7 ± 0.1 | 0.7 ± 0.0 | 0.7 ± 0.1 |
| Brown adipose tissue, % BW | 0.3 ± 0.0              | 0.3 ± 0.0 | 0.3 ± 0.0 | 0.3 ± 0.0 | 0.3 ± 0.0               | 0.3 ± 0.0 | 0.6 ± 0.1 | 0.5 ± 0.1 |
| Perigonadal WAT, % BW      | 1.3 ± 0.1              | 1.2 ± 0.1 | 1.1 ± 0.2 | 1.2 ± 0.1 | 5.3 ± 1.3               | 7.6 ± 1.6 | 4.7 ± 0.7 | 4.3 ± 0.7 |
| Retroperitoneal WAT, % BW  | ND                     | ND        | 0.2 ± 0.0 | 0.3 ± 0.1 | 0.9 ± 0.2               | 1.2 ± 0.2 | 1.2 ± 0.2 | 1.0 ± 0.1 |
| Inguinal WAT, % BW         | 0.9 ± 0.0              | 1.0 ± 0.1 | 0.8 ± 0.1 | 0.8 ± 0.1 | 2.8 ± 0.6               | 3.3 ± 0.5 | 2.7 ± 0.5 | 2.0 ± 0.4 |
| Glucose, mg/dL             | 291 ± 7                | 273 ± 12  | 290 ± 21  | 249 ± 19  | 290 ± 9                 | 297 ± 9   | 285 ± 26  | 282 ± 13  |
| Insulin, ng/mL             | ND                     | ND        | 0.6 ± 0.1 | 0.6 ± 0.1 | ND                      | ND        | 2.5 ± 0.6 | 2.3 ± 0.5 |
| Triglycerides, mg/dL       | 30 ± 1*                | 42 ± 3    | 35 ± 1*   | 41 ± 3    | 25 ± 2                  | 29 ± 2    | 30 ± 4    | 32 ± 1    |
| Total cholesterol, mg/dL   | 34 ± 2                 | 37 ± 3    | 43 ± 2    | 42 ± 2    | 57 ± 5                  | 60 ± 4    | 80 ± 7    | 87 ± 4    |
| Free fatty acids, mmol/L   | 0.7 ± 0.1              | 0.9 ± 0.2 | 1.0 ± 0.1 | 1.0 ± 0.1 | 0.9 ± 0.1               | 0.9 ± 0.1 | 0.8 ± 0.0 | 1.0 ± 0.0 |

BW, body weight; ND, not determined. Data are mean ± SEM measured at age 4 months in mice fed with regular chow and 8 months in mice fed with a high-fat diet for 6 months. Organ weights represent % body weight.

\**P* < .05 compared with WT littermates within each group.

Table S2. Blood pressures of *Pparg* mutants compared with their WT littermates. A. *Pparg*<sup>B/+</sup> × *Pparg*<sup>+/+</sup>

|         | Age, diet     | B/+          | +/+          |
|---------|---------------|--------------|--------------|
| Females |               |              |              |
| [d]     | 4 months, RC  | 100 ± 1* (8) | 107 ± 2 (8)  |
| [e]     | 9 months, RC  | 102 ± 4 (8)  | 104 ± 2 (10) |
| [f]     | 12 months, HF | 92 ± 2 (10)  | 90 ± 2 (10)  |
| Males   |               |              |              |
| [d]     | 4 months, RC  | 101 ± 3 (8)  | 97 ± 2 (8)   |
| [e]     | 9 months, RC  | 98 ± 4 (7)   | 99 ± 4 (8)   |
| [f]     | 12 months, HF | 81 ± 3 (10)  | 80 ± 3 (10)  |

Table S2B. *Pparg*<sup>C/+</sup> × *Pparg*<sup>C/+</sup>

|         | Age, diet     | C/C         | C/+          | +/+         |
|---------|---------------|-------------|--------------|-------------|
| Females |               |             |              |             |
| [g]     | 4 months, RC  | 118 ± 4 (7) | 115 ± 2 (15) | 116 ± 4 (6) |
| [h]     | 16 months, RC | 106 ± 5 (6) | 98 ± 3 (11)  | 100 ± 2 (5) |
| [i]     | 4 months, HF  | 115 ± 2 (7) | 109 ± 2 (16) | 111 ± 3 (9) |
| Males   |               |             |              |             |
| [g]     | 4 months, RC  | 113 ± 4 (8) | 114 ± 3 (12) | 112 ± 3 (9) |
| [h]     | 16 months, RC | 105 ± 4 (6) | 99 ± 3 (8)   | 96 ± 3 (6)  |
| [i]     | 4 months, HF  | 105 ± 3 (6) | 109 ± 2 (18) | 113 ± 3 (8) |

Table S2C. *Pparg*<sup>C/+</sup> × *Pparg*<sup>+/-</sup>

|         | Age, diet    | C/-           | +/-          | C/+          | +/+          |
|---------|--------------|---------------|--------------|--------------|--------------|
| Females |              |               |              |              |              |
| [j]     | 4 months, RC | 109 ± 1* (13) | ND           | ND           | 104 ± 2 (17) |
| [k]     | 4 months, RC | 108 ± 3 (9)   | 105 ± 3 (15) | 106 ± 2 (16) | 106 ± 2 (16) |
| [l]     | 7 months, RC | 107 ± 5 (6)   | 108 ± 3* (6) | ND           | 101 ± 2 (16) |
| Males   |              |               |              |              |              |
| [j]     | 4 months, RC | 104 ± 2 (11)  | ND           | ND           | 106 ± 2 (12) |
| [k]     | 4 months, RC | 119 ± 6* (5)  | 113 ± 2 (10) | 110 ± 2 (12) | 108 ± 1 (18) |
| [l]     | 7 months, RC | 110 ± 5 (6)   | 111 ± 2 (7)  | 106 ± 2 (7)  | 107 ± 2 (15) |

RC, regular chow; HF, Western-style high-fat diet; ND, not determined.

Data are mean ± SEM, in mm Hg. The numbers of mice are given in parentheses. [d]-[l] indicate experiment numbers.

\**P* < .05 against WT littermates (+/+) by Student *t* test.

**Table S3. Parameter estimates of blood pressure. ANCOVA**

| Term                 | Estimate | SE   | Prob > t |
|----------------------|----------|------|----------|
| Intercept            | 111.14   | 3.59 | <.0001   |
| Expression (fold WT) | -2.79    | 0.86 | 0.0012   |
| Age                  | -1.36    | 0.45 | 0.0173   |
| Sex                  | 0.88     | 0.35 | 0.0115   |
| Diet                 | -1.25    | 1.57 | 0.4520   |
| Expression × age     | -0.53    | 0.26 | 0.0432   |
| Expression × sex     | 0.70     | 0.52 | 0.1737   |
| Expression × diet    | 0.44     | 0.88 | 0.6170   |
| Age × sex            | 0.17     | 0.09 | 0.0734   |
| Age × diet           | -1.04    | 0.46 | 0.0516   |
| Sex × diet           | 0.67     | 0.37 | 0.0690   |

**Table S3 (continued). Random-effect predictions**

| Term           | BLUP  | SE   | Prob > t |
|----------------|-------|------|----------|
| Experiment [a] | -3.70 | 2.12 | 0.1085   |
| Experiment [b] | 3.67  | 2.54 | 0.1845   |
| Experiment [c] | -5.88 | 2.83 | 0.0690   |
| Experiment [d] | -2.91 | 2.24 | 0.2164   |
| Experiment [e] | -0.75 | 2.34 | 0.7534   |
| Experiment [f] | -0.37 | 4.25 | 0.9342   |
| Experiment [g] | 8.40  | 2.10 | 0.0022   |
| Experiment [h] | -3.13 | 3.97 | 0.4517   |
| Experiment [i] | 2.57  | 3.70 | 0.5094   |
| Experiment [j] | -0.80 | 2.14 | 0.7155   |
| Experiment [k] | 2.32  | 2.11 | 0.2974   |
| Experiment [l] | 0.57  | 1.91 | 0.7728   |

**Table S3 (continued). REML variance component estimates**

| Random effect | Variance ratio | Variance component | SE    | % of total |
|---------------|----------------|--------------------|-------|------------|
| Experiment    | 0.32           | 21.51              | 12.10 | 24.348     |
| Residual      |                | 66.84              | 3.76  | 75.652     |
| Total         |                | 88.35              |       | 100.000    |

PPAR $\gamma$  expression levels (fold WT), with sex, diet, and age as variables with fixed effects. Experiment was used as a categorical variable with random effects. Three-way and 4-way interactions of the fixed terms were not significant and were not included in this model.
